# Supplementary material for: Model calculations for the prediction of the diradical character of physisorbed molecules: p-benzyne/MgO and p-benzyne/SrO
Source: Royal Society of Chemistry journal article supplement (doi:10.1039/d3cp02988c), 2023-01-01
Supplement: d3cp02988c1.pdf [file d3cp02988c1.pdf]

ARTICLE

Supporting Information for

**“Model calculations for the prediction of the diradical character of physisorbed molecules: p-Benzyne/MgO and p-Benzyne/SrO”**

Kohei Tada,<sup>\*a</sup> Takashi Kawakami<sup>b,c</sup> and Yoyo Hinuma<sup>a</sup>

*a. Research Institute of Electrochemical Energy (RIECEN), Department of Energy and Environment, National Institute of Advanced Industrial Science and Technology (AIST), 1–8–31 Midorigaoka, Ikeda, Osaka 563–8577, Japan.*

*b. RIKEN Center for Computational Science, Kobe, Hyogo 650-0047, Japan.*

*c. Graduate School of Science, Osaka University, Toyonaka, Osaka 560-0043, Japan.*

# Phone: +81-72-751-8566; Fax: +81-72-751-9714; Email: k-tada@aist.go.jp

**Table of Contents**

- Specific values of spin contamination errors: Tables S1 and S2 p. 2
- Local magnetic moments of benzyne with and without surface interactions: Tables S3 and S4 p. 2
- Local magnetic moments of atoms in the MgO and SrO models with benzyne adsorptions: Table S5 p. 3–4
- The results of plotting the  $y$  values against the interatomic distances, bond angles, and bond dihedral angles: Figures S1–S6 p. 5–10
- The dependence of the diradical character on the distances when the optimised p-benzyne is systematically distorted: Figs. S7–S9 p. 11–13
- The dependence of charge polarisation of Model D on the k-point sampling: Fig. S10 p. 14

**Table S1.** Spin contamination errors (SCEs) in the total energies of the calculated models.

| Model                  | SCE [eV] |
|------------------------|----------|
| Model A; Fig. 2(a)     | 0.198    |
| Model B; Fig. 2(b)     | 0.188    |
| Model C; Fig. 2(c)     | 0.181    |
| Model D; Fig. 2(d)     | 0.175    |
| Model E; Fig. 2(e)     | 0.179    |
| Model A'; Fig. 10(a,b) | 0.199    |
| Model B'; Fig. 10(c,d) | 0.192    |
| Model C'; Fig. 10(e,f) | 0.184    |
| Model D'; Fig. 10(g,h) | 0.072    |
| Model E'; Fig. 10(i,j) | 0.147    |
| Benzyne; Fig. 4(a)     | 0.209    |

**Table S2.**  $E_{\text{dis}}$  values with ( $E_{\text{dis, AP}}$ ) and without ( $E_{\text{dis, DFT}}$ ) spin contamination error correction

| Model              | $E_{\text{dis, AP}}$ [meV] | $E_{\text{dis, DFT}}$ [meV] |
|--------------------|----------------------------|-----------------------------|
| Model A; Fig. 2(a) | 2                          | 1                           |
| Model B; Fig. 2(b) | 5                          | 9                           |
| Model C; Fig. 2(c) | -3                         | 4                           |
| Model D; Fig. 2(d) | -1                         | 4                           |
| Model E; Fig. 2(e) | -1                         | 12                          |

**Table S3.** Local magnetic moment ( $\mu_B$  [ $e^-$ ]) of atoms in benzyne in models without surfaces

| Atoms <sup>a</sup> | Model A | Model B | Model C | Model D | Model E |
|--------------------|---------|---------|---------|---------|---------|
| C1                 | 0.037   | 0.035   | 0.036   | 0.036   | 0.035   |
| C2                 | -0.035  | -0.035  | -0.036  | -0.036  | -0.035  |
| C3                 | 0.442   | 0.440   | 0.440   | 0.440   | 0.439   |
| C4                 | -0.037  | -0.035  | -0.036  | -0.036  | -0.035  |
| C5                 | 0.036   | 0.035   | 0.036   | 0.036   | 0.035   |
| C6                 | -0.442  | -0.440  | -0.440  | -0.440  | -0.439  |
| H1                 | -0.008  | -0.008  | -0.008  | -0.008  | -0.008  |
| H2                 | 0.008   | 0.008   | 0.008   | 0.008   | 0.008   |
| H3                 | 0.008   | 0.008   | 0.008   | 0.008   | 0.008   |
| H4                 | -0.008  | -0.008  | -0.008  | -0.008  | -0.008  |

<sup>a</sup> Atom labelling is given in Fig. 4(a), and C3 and C6 atoms are main spin sites.

**Table S4.** Local magnetic moments ( $\mu_B$  [ $e^-$ ]) of atoms in benzyne models with surfaces

| Atoms <sup>a</sup> | Model A | Model B | Model C | Model D | Model E |
|--------------------|---------|---------|---------|---------|---------|
| C1                 | 0.035   | 0.035   | 0.035   | 0.032   | 0.032   |
| C2                 | -0.036  | -0.027  | -0.033  | -0.032  | -0.031  |
| C3                 | 0.437   | 0.425   | 0.416   | 0.387   | 0.406   |
| C4                 | -0.035  | -0.027  | -0.034  | -0.031  | -0.032  |
| C5                 | 0.036   | 0.035   | 0.033   | 0.032   | 0.031   |
| C6                 | -0.438  | -0.405  | -0.417  | -0.415  | -0.408  |
| H1                 | -0.008  | -0.005  | -0.007  | -0.007  | -0.007  |
| H2                 | 0.007   | 0.009   | 0.007   | 0.007   | 0.007   |
| H3                 | 0.008   | 0.009   | 0.007   | 0.007   | 0.007   |
| H4                 | -0.007  | -0.005  | -0.007  | -0.007  | -0.007  |

<sup>a</sup> Atom labelling is given in Fig. 4(a), and C3 and C6 atoms are main spin sites

**Table S5.** Local magnetic moments ( $\mu_B$  [e<sup>-</sup>]) of atoms in models of MgO or SrO with benzyne adsorptions

| Atoms <sup>a</sup> | Model A | Model B | Model C | Model D | Model E |
|--------------------|---------|---------|---------|---------|---------|
| A1                 | 0.000   | 0.000   | 0.000   | 0.002   | 0.000   |
| A2                 | 0.000   | 0.000   | 0.000   | 0.000   | 0.000   |
| A3                 | 0.000   | 0.000   | 0.000   | 0.000   | 0.000   |
| A4                 | 0.000   | 0.000   | 0.000   | 0.000   | 0.000   |
| A5                 | 0.000   | 0.000   | 0.000   | 0.000   | 0.000   |
| A6                 | 0.000   | 0.000   | 0.000   | 0.000   | 0.000   |
| A7                 | 0.000   | 0.000   | 0.000   | 0.000   | 0.000   |
| A8                 | 0.000   | 0.000   | 0.000   | 0.000   | 0.000   |
| A9                 | 0.000   | 0.000   | 0.000   | 0.000   | 0.000   |
| A10                | 0.000   | 0.000   | 0.000   | 0.000   | 0.000   |
| A11                | 0.000   | 0.000   | 0.001   | 0.000   | 0.000   |
| A12                | 0.000   | 0.000   | 0.000   | 0.002   | 0.002   |
| A13                | 0.000   | 0.000   | 0.000   | 0.000   | 0.000   |
| A14                | 0.000   | 0.000   | 0.000   | 0.000   | 0.000   |
| A15                | 0.000   | 0.000   | -0.001  | 0.000   | -0.002  |
| A16                | 0.000   | 0.000   | 0.000   | 0.000   | 0.000   |
| A17                | 0.000   | 0.000   | 0.000   | 0.009   | 0.000   |
| A18                | 0.000   | 0.000   | 0.000   | 0.000   | 0.000   |
| A19                | 0.000   | 0.000   | 0.000   | 0.000   | 0.000   |
| A20                | 0.000   | 0.000   | 0.000   | 0.000   | 0.000   |
| A21                | 0.000   | 0.000   | 0.000   | 0.000   | 0.000   |
| A22                | 0.000   | 0.000   | 0.000   | 0.000   | 0.000   |
| A23                | 0.000   | 0.000   | 0.000   | 0.000   | 0.000   |
| A24                | 0.000   | -0.003  | 0.000   | 0.000   | 0.000   |
| A25                | 0.000   | 0.000   | 0.000   | -0.003  | 0.000   |
| A26                | 0.000   | 0.001   | 0.000   | 0.001   | 0.000   |
| A27                | 0.000   | 0.001   | 0.014   | 0.001   | 0.000   |
| A28                | 0.000   | 0.000   | 0.015   | 0.035   | 0.061   |
| A29                | 0.000   | 0.001   | 0.000   | 0.001   | -0.001  |
| A30                | 0.000   | 0.000   | -0.012  | -0.003  | 0.000   |
| A31                | 0.000   | 0.000   | -0.015  | 0.000   | -0.054  |
| A32                | 0.000   | 0.001   | 0.000   | 0.001   | 0.000   |
| O1                 | 0.000   | 0.000   | 0.000   | 0.000   | 0.000   |
| O2                 | 0.000   | 0.000   | 0.000   | 0.000   | 0.000   |
| O3                 | 0.000   | 0.000   | 0.000   | 0.000   | 0.000   |
| O4                 | 0.000   | 0.000   | 0.000   | 0.000   | 0.000   |
| O5                 | 0.000   | 0.000   | 0.000   | 0.000   | 0.000   |
| O6                 | 0.000   | 0.000   | 0.000   | 0.000   | 0.000   |
| O7                 | 0.000   | 0.000   | 0.000   | 0.000   | 0.000   |
| O8                 | 0.000   | 0.000   | 0.000   | 0.000   | 0.000   |
| O9                 | 0.000   | 0.000   | 0.000   | 0.000   | 0.000   |
| O10                | 0.000   | 0.000   | 0.000   | 0.000   | 0.000   |
| O11                | 0.000   | 0.000   | 0.000   | 0.000   | 0.000   |
| O12                | 0.000   | 0.000   | 0.000   | 0.000   | 0.000   |
| O13                | 0.000   | 0.000   | 0.000   | 0.000   | 0.000   |
| O14                | 0.000   | 0.000   | 0.000   | 0.000   | 0.000   |
| O15                | 0.000   | 0.000   | 0.000   | 0.000   | 0.000   |
| O16                | 0.000   | 0.000   | 0.000   | 0.000   | 0.000   |
| O17                | 0.000   | 0.000   | 0.000   | 0.000   | 0.000   |
| O18                | 0.000   | -0.002  | 0.000   | 0.000   | 0.000   |
| O19                | 0.000   | -0.002  | 0.000   | 0.000   | 0.000   |
| O20                | 0.000   | 0.000   | 0.000   | 0.001   | 0.002   |
| O21                | 0.001   | -0.002  | 0.000   | 0.000   | 0.000   |
| O22                | 0.000   | 0.000   | 0.000   | 0.000   | 0.000   |
| O23                | 0.000   | 0.000   | 0.000   | 0.000   | -0.002  |
| O24                | 0.000   | -0.002  | 0.000   | 0.000   | 0.000   |

## ARTICLE

## Journal Name

|     |        |        |        |       |        |
|-----|--------|--------|--------|-------|--------|
| O25 | 0.014  | 0.000  | 0.001  | 0.002 | 0.000  |
| O26 | 0.000  | 0.001  | 0.000  | 0.000 | 0.001  |
| O27 | -0.010 | 0.000  | 0.000  | 0.000 | 0.000  |
| O28 | 0.000  | 0.000  | -0.001 | 0.000 | -0.001 |
| O29 | 0.000  | 0.001  | 0.000  | 0.000 | 0.000  |
| O30 | 0.000  | 0.000  | 0.000  | 0.000 | 0.000  |
| O31 | 0.000  | 0.001  | 0.000  | 0.000 | 0.000  |
| O32 | 0.000  | -0.097 | 0.000  | 0.000 | 0.000  |

<sup>a</sup> A1-A32 are Mg or Sr atoms, and O1-O64 are O atoms.

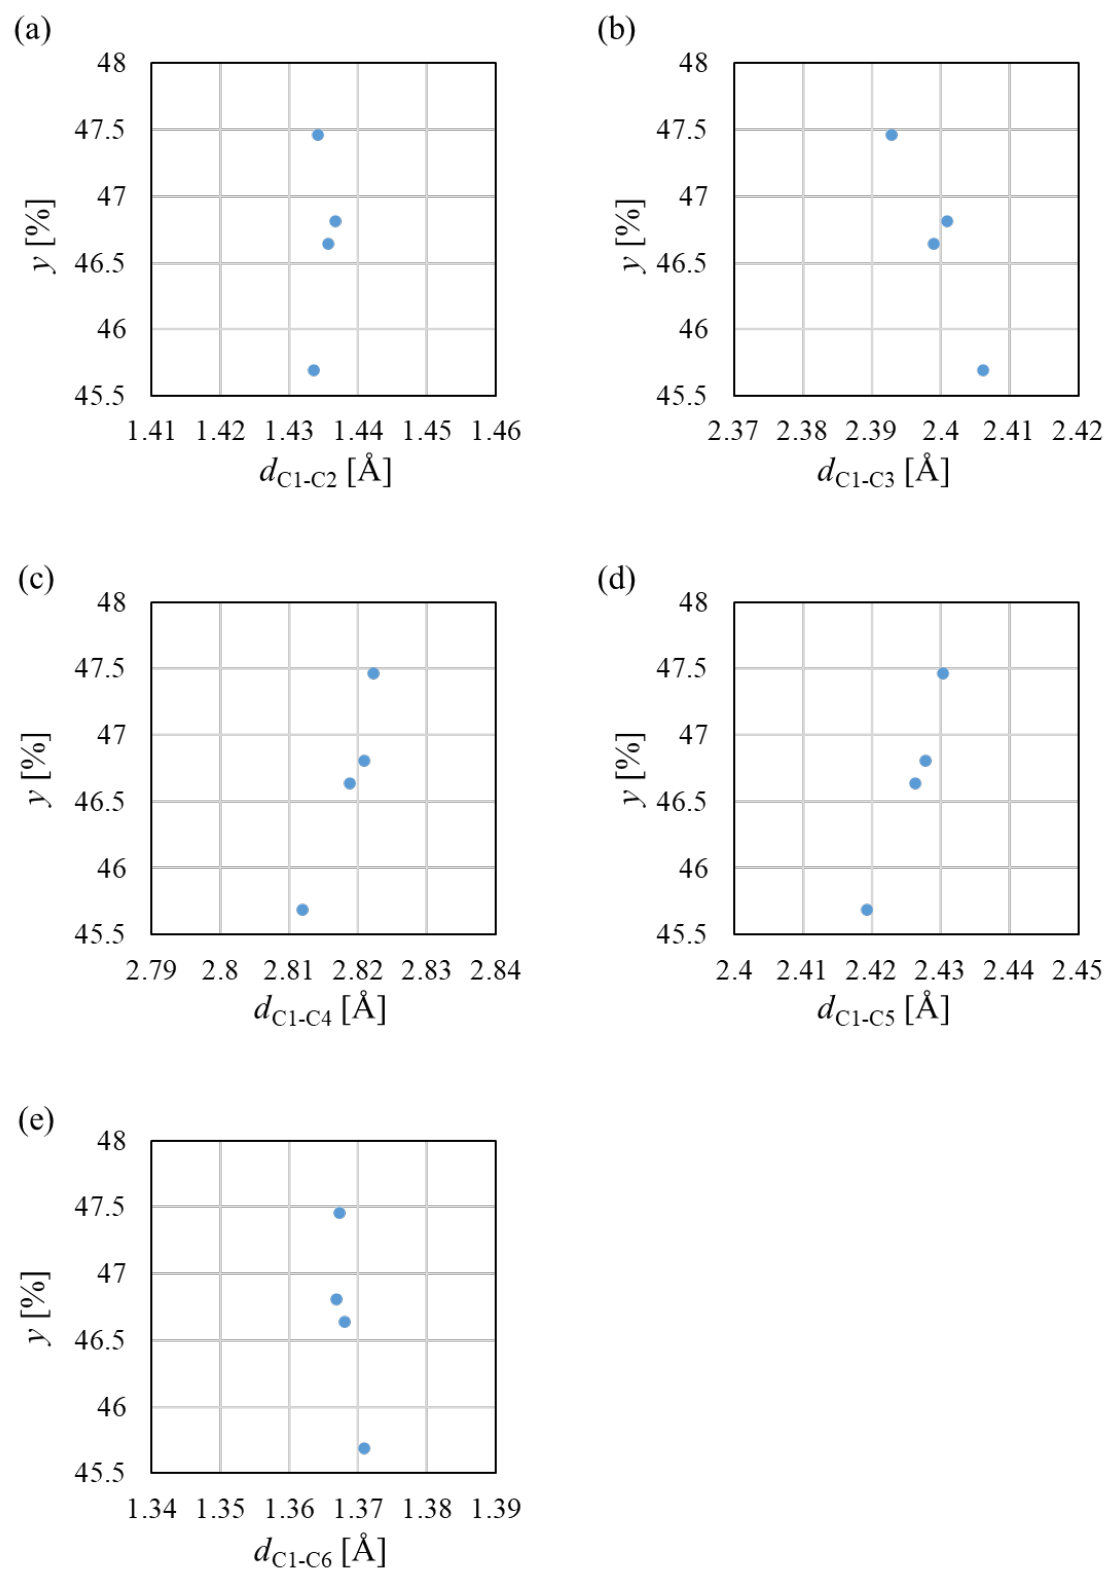

**Figure S1.** The plotted diradical character ( $\gamma$ ) against distances (a)  $d_{C1-C2}$ , (b)  $d_{C1-C3}$ , (c)  $d_{C1-C4}$ , (d)  $d_{C1-C5}$ , and (e)  $d_{C1-C6}$ , where  $d_{A-B}$  refers to the distance between atoms A and B, and indices for C atoms are shown in the main text (Fig. 4(a)).

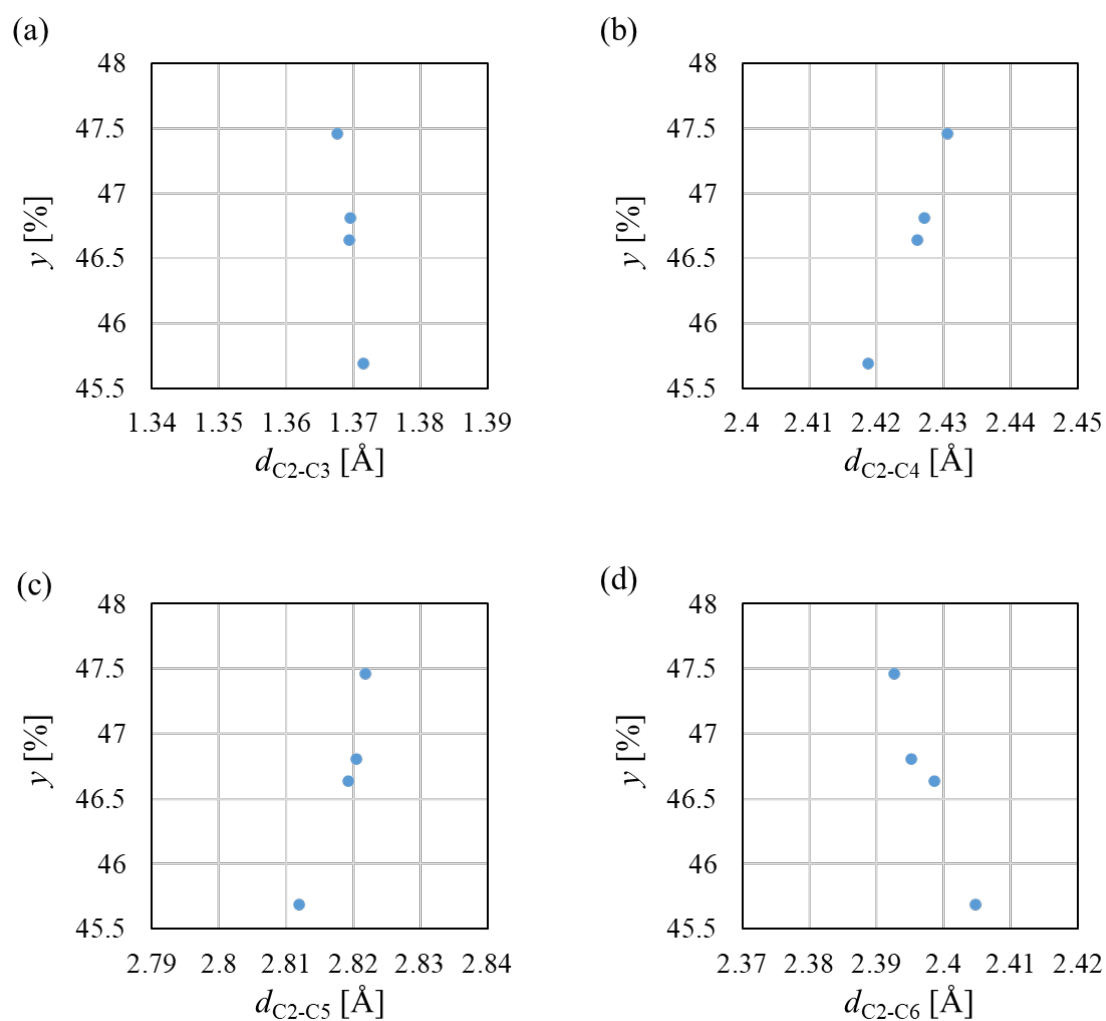

**Figure S2.** The plotted diradical character ( $\gamma$ ) against distances (a)  $d_{C2-C3}$ , (b)  $d_{C2-C4}$ , (c)  $d_{C2-C5}$ , and (d)  $d_{C2-C6}$ , where  $d_{A-B}$  refers to the distance between atoms A and B, and indices for C atoms are shown in the main text (Fig. 4(a)).

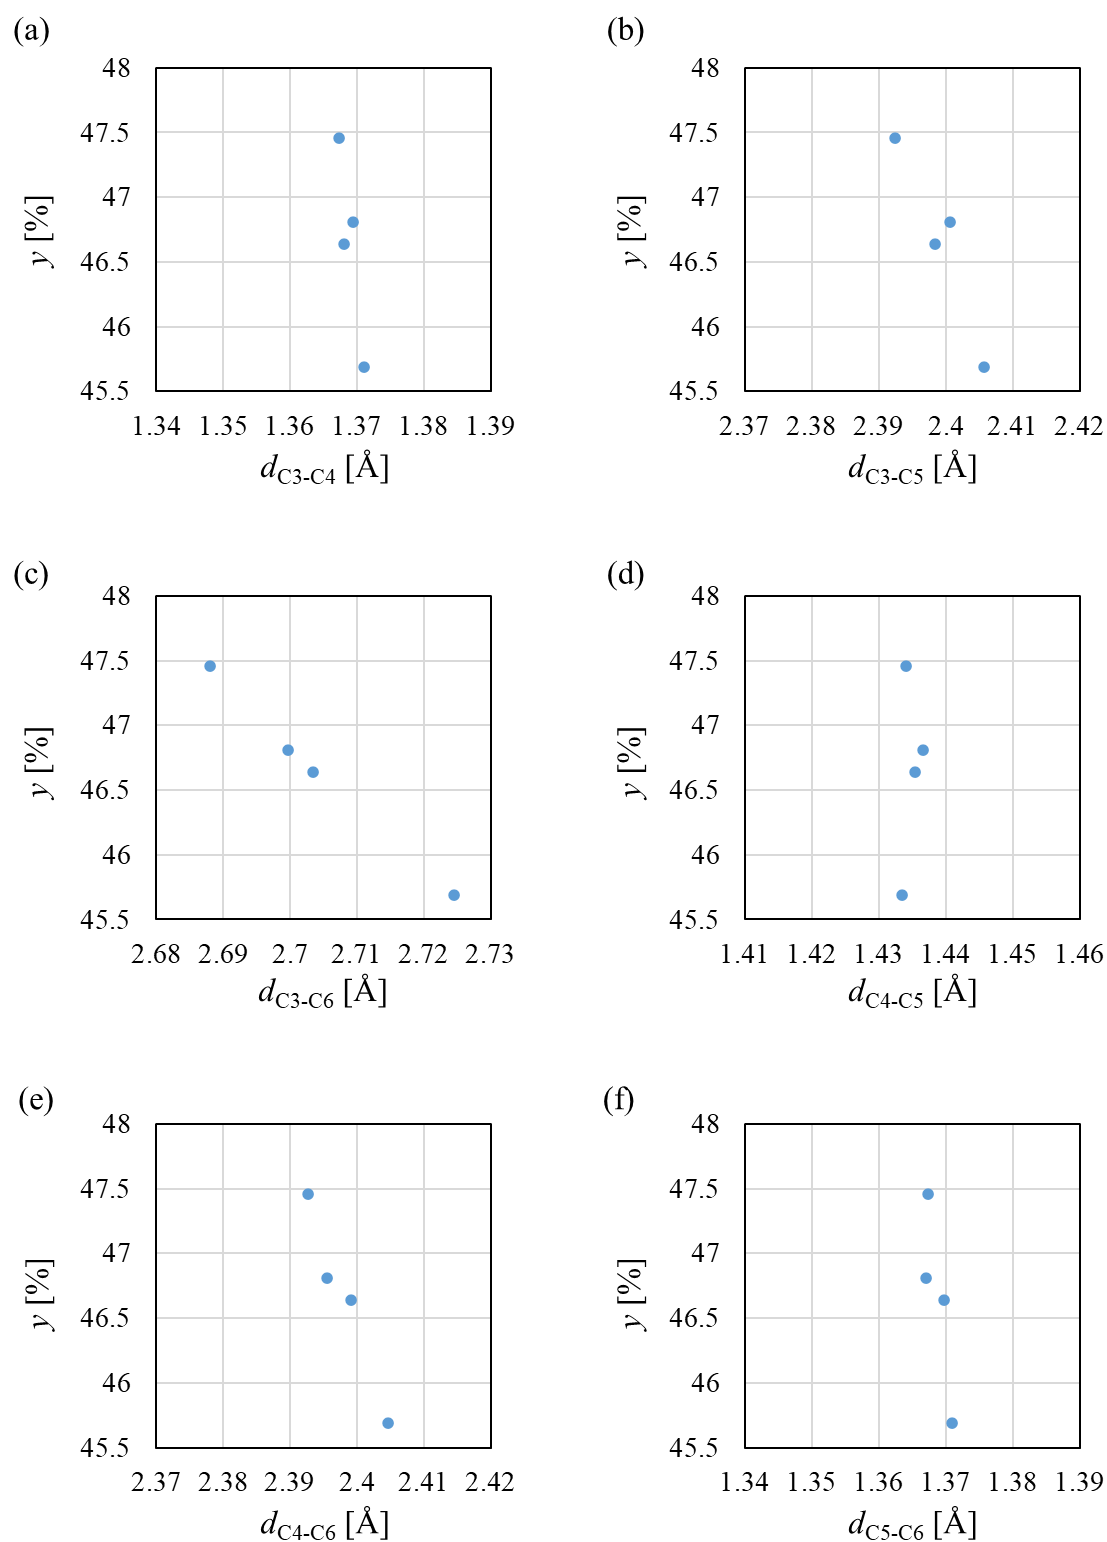

**Figure S3.** The plotted diradical character ( $y$ ) against distances (a)  $d_{C3-C4}$ , (b)  $d_{C3-C5}$ , (c)  $d_{C3-C6}$ , (d)  $d_{C4-C5}$ , (e)  $d_{C4-C6}$ , and (f)  $d_{C5-C6}$ , where  $d_{A-B}$  refers to the distance between atoms A and B atoms, and indices for C atoms are shown in the main text (Fig. 4(a)).

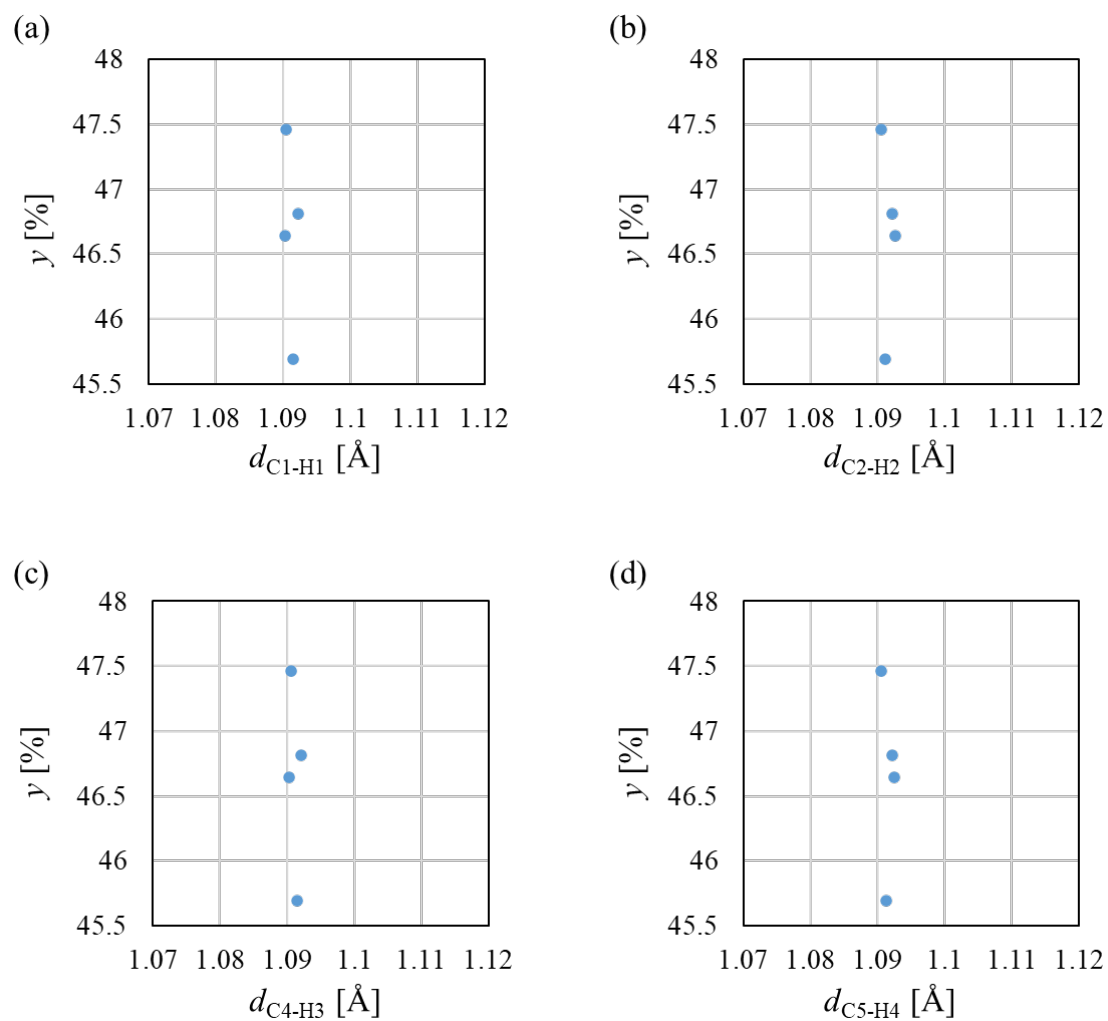

**Figure S4.** The plotted diradical character ( $y$ ) against distances (a)  $d_{C1-H1}$ , (b)  $d_{C2-H2}$ , (c)  $d_{C4-H3}$ , and (d)  $d_{C5-H4}$ , where  $d_{A-B}$  refers to the distance between atoms A and B atoms, and indices for C atoms are shown in the main text (Fig. 4(a)).



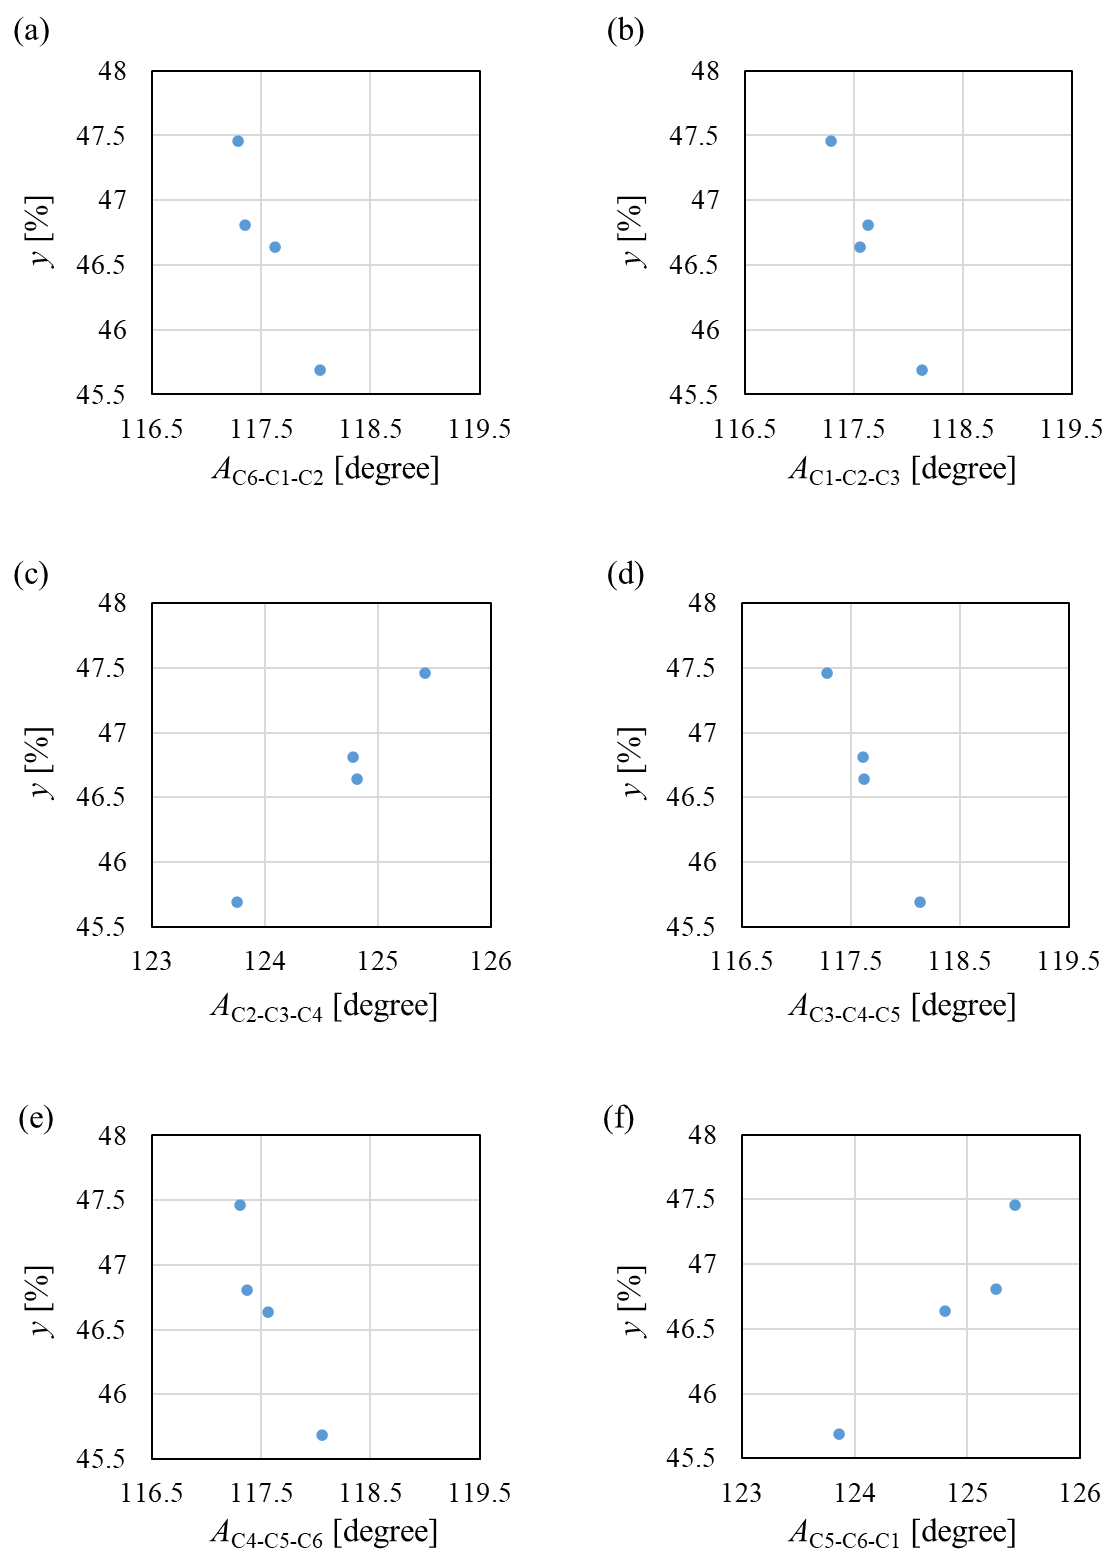

**Figure S5.** The plotted diradical character ( $y$ ) against angles (a)  $A_{C6-C1-C2}$ , (b)  $A_{C1-C2-C3}$ , (c)  $A_{C2-C3-C4}$ , (d)  $A_{C3-C4-C5}$ , (e)  $A_{C4-C5-C6}$ , and (f)  $A_{C5-C6-C1}$ , where  $A_{A-B-C}$  refers to the angle between atoms ABC (around atom B), and indices for C atoms are shown in the main text (Fig. 4(a)).

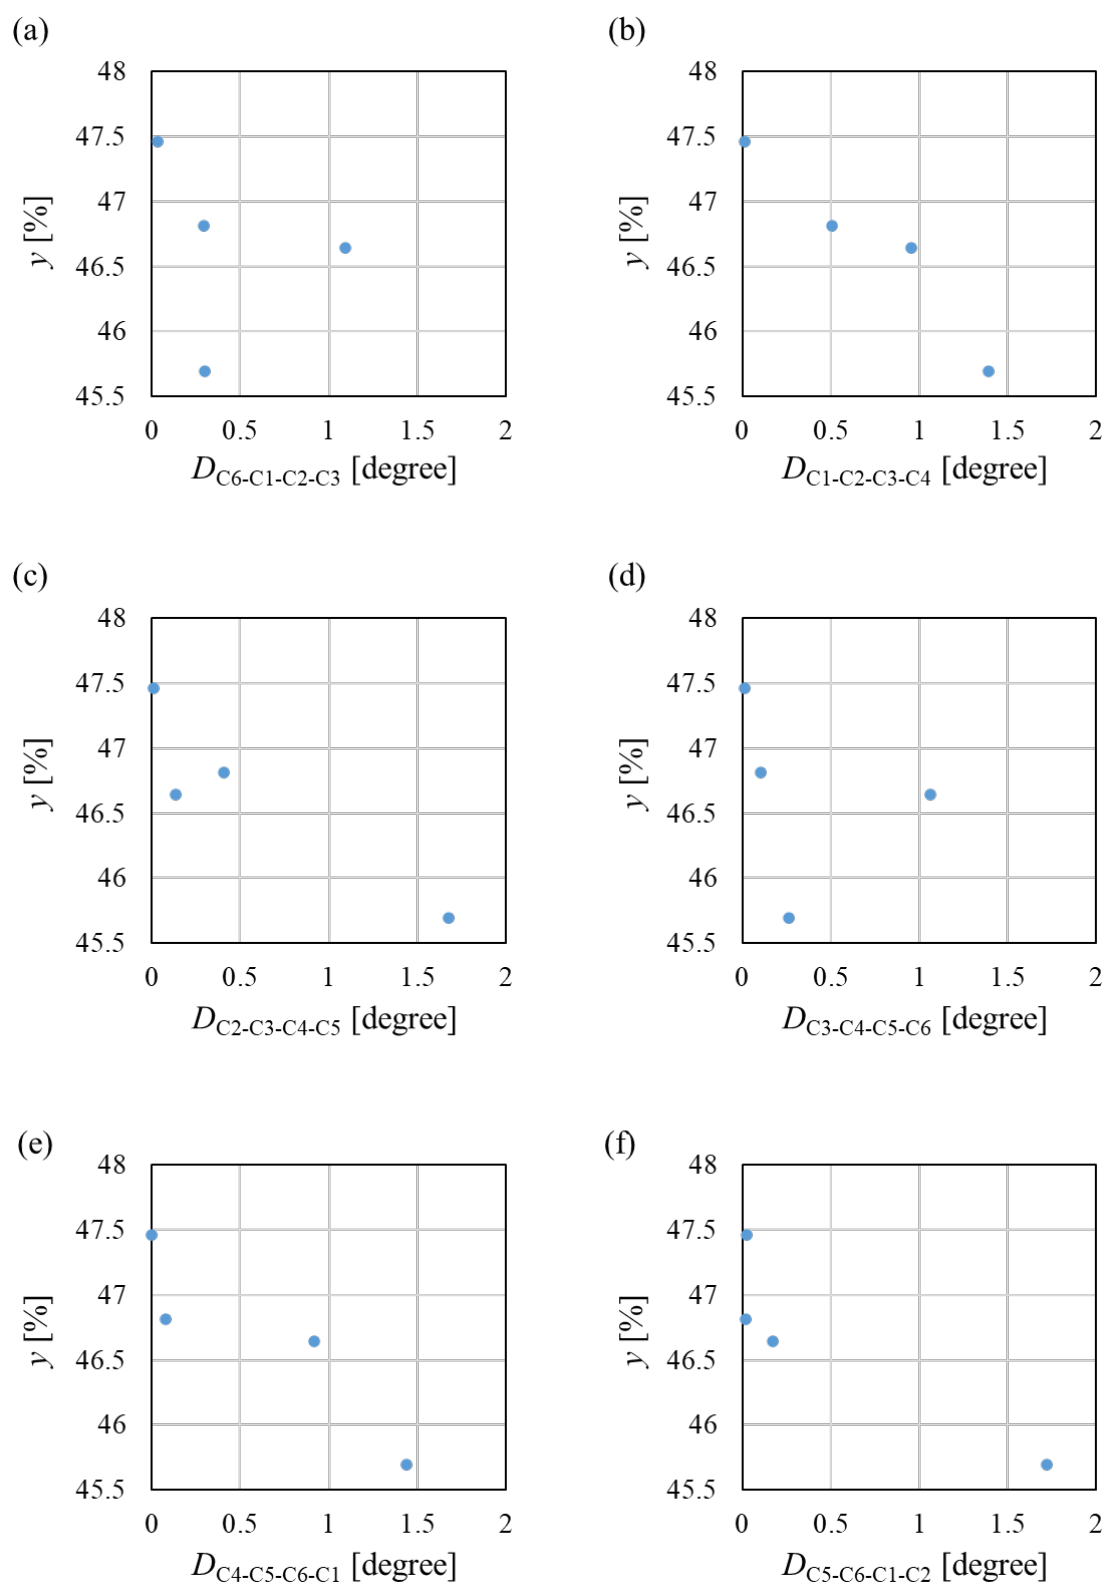

**Figure S6.** The plotted diradical character ( $y$ ) against dihedral angles (a)  $D_{C6-C1-C2-C3}$ , (b)  $D_{C1-C2-C3-C4}$ , (c)  $D_{C2-C3-C4-C5}$ , (d)  $D_{C3-C4-C5-C6}$ , (e)  $D_{C4-C5-C6-C1}$ , and (f)  $D_{C5-C6-C1-C2}$ , where  $D_{A-B-C-D}$  refers to the angles between planes ABC and BCD, and indices for C atoms are shown in the main text (Fig. 4(a)).

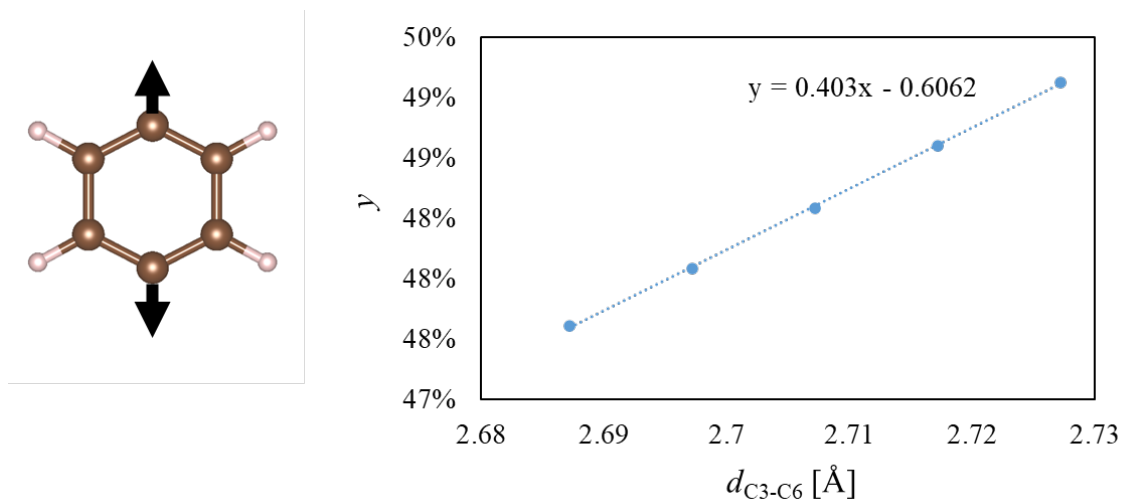

**Figure S7.** The dependence of the diradical character on the distance between atoms C3 and C6 when the optimised p-benzyne is systematically distorted (the distortion is shown in the left panel). The explanation for this index is provided in the main text (Fig. 4(a)).

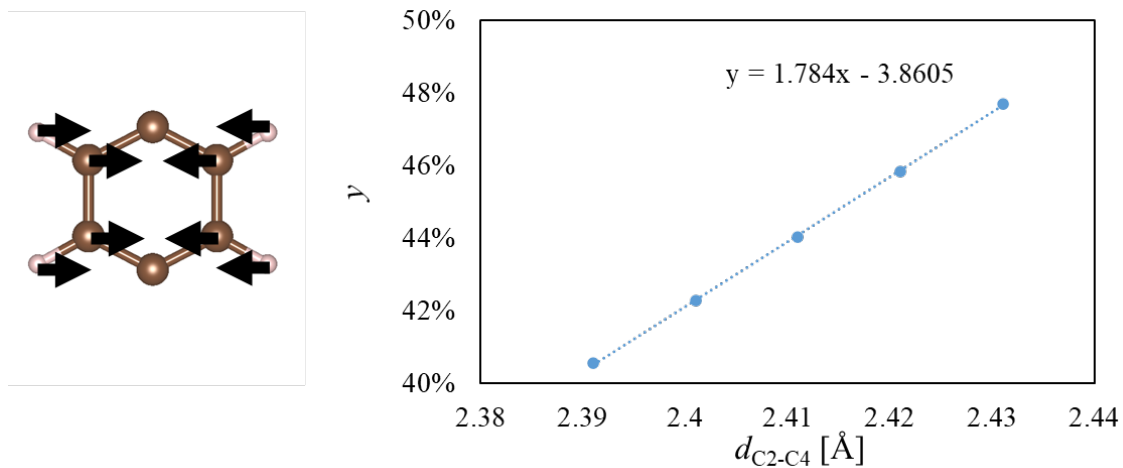

**Figure S8.** The dependence of the diradical character on the distance between atoms C2 and C4 atoms when the optimised p-benzyne is systematically distorted (the distortion is shown in the left panel). The explanation for this index is provided in the main text (Fig. 4(a)).

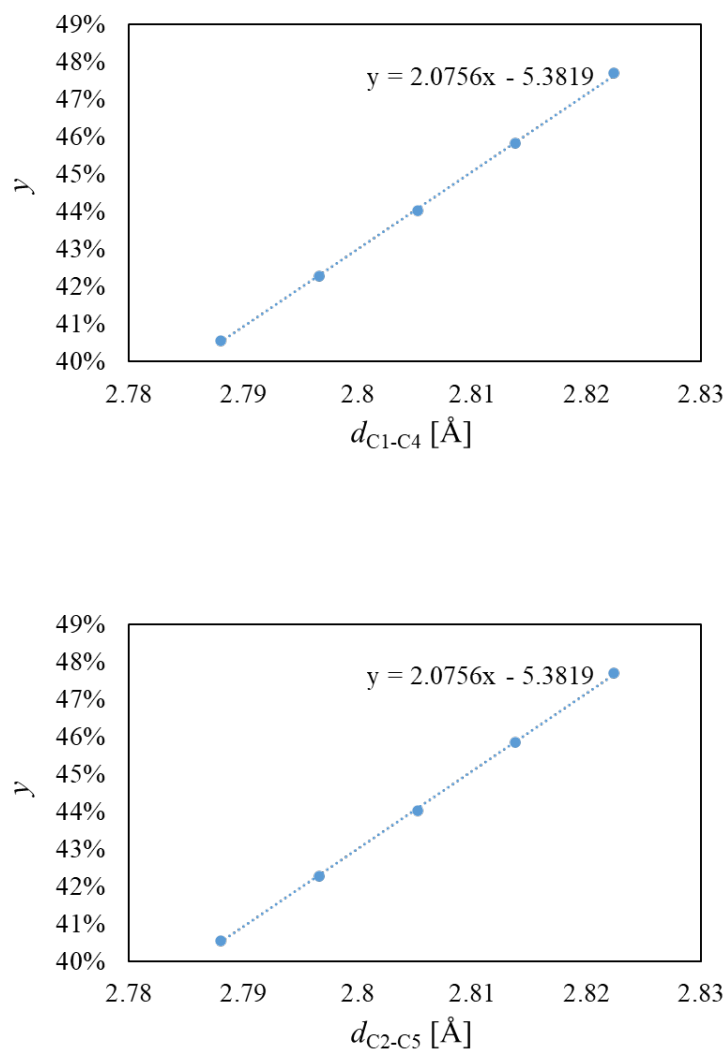

**Figure S9.** The dependence of the diradical character on the distance between atoms (a) C1 and C4 and (b) C2 and C5 when the optimised p-benzyne is systematically distorted (the distortion is shown in Fig. S8). The explanation for this index is provided in the main text (Fig. 4(a)).

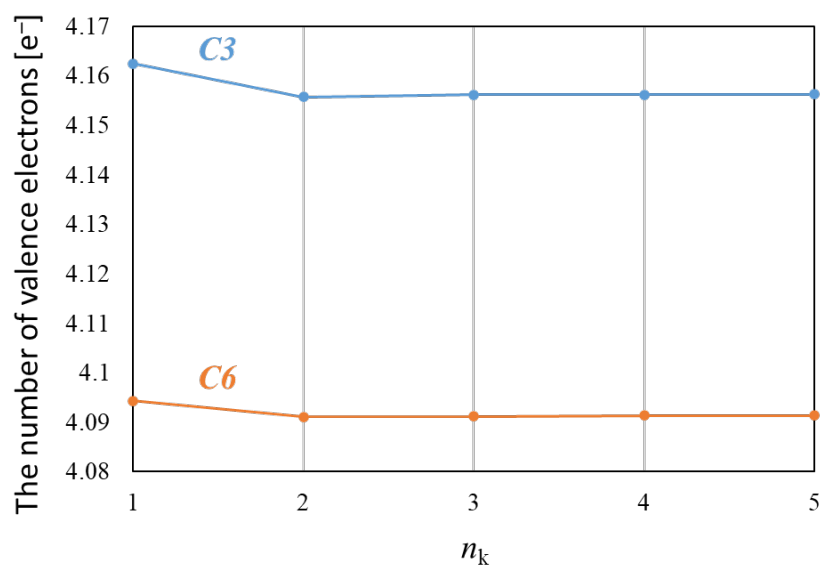

**Figure S10.** The dependences of the number of valence electrons of C3 and C6 in the Model D on the k-points sampling ( $n_k \times n_k \times 1$ ).
